# Supplementary material for: Defining Core and Penumbra in Ischemic Stroke: A Voxel- and Volume-Based Analysis of Whole Brain CT Perfusion
Source: PubMed Central journal article supplement (PMC4748242; doi:10.1038/srep20932), 2016-02-10
Supplement: srep20932-s1.pdf [file srep20932-s1.pdf]

# **Online Supplement**

**Defining Core and Penumbra in Ischemic Stroke: A Voxel- and**

**Volume-Based Analysis of Whole Brain CT Perfusion**

Yannan Yu, MD; Quan Han, MD; Xinfu Ding, MD; Qingmeng Chen, MD; Keqi Ye, MD;

Sheng Zhang, MD, PhD; Shenqiang Yan, MD; Bruce C.V. Campbell, MBBS, BMedSc, PhD,

FRACP; Mark W. Parsons, MBBS, PhD, FRACP; Shaoshi Wang, MD; \*Min Lou, MD, PhD

## Supplemental methods

MISar (Apollo Medical Imaging Technology, Melbourne, Australia) automatically selected a normal major artery (usually the ACA or MCA) for arterial input function (AIF), and a large draining vein (such as the sagittal sinus) for venous outflow function (VOF). Deconvolution of the tissue enhancement curve and AIF was performed using delay- and dispersion-corrected singular value deconvolution (dd-SVD). Non-brain voxels, such as ventricle and skull, were removed automatically according to Hounsfield unit threshold (usually set as 25 HU for ventricle and 150 HU for skull). Vessel segmentation threshold was set as Voxels with CBF value  $\geq 2 \times$  (normal CBF value).

Twenty-four hour image was co-registered to the baseline CTP manually, using rigid body transformation with or without scaling and affine, and were re-sliced to reach the maximum correspondence of the baseline CTP and 24h image (using MISar). ROIs of Infarct lesions on co-registered and re-sliced 24h image were delineated for each slice, and then the total infarct lesion volumes for one case were then calculated by MISar.

In voxel-based analysis, to prevent a very large number of true negative voxels from overwhelming the ratio to false positive voxels when calculating specificity, only the hemispheric brain voxels were analyzed for penumbra threshold.

In volume-based analysis, the corresponding regions of investigated thresholds were automatically delineated and marked on baseline CTP, and then each baseline perfusion lesion volume was calculated by MISar. Mean magnitude was used as a determinant index for threshold evaluation. Mean magnitude refers to the average of absolute mean difference values. It can be a more reasonable index to define the best agreement than mean difference because it reflects both bias and standard deviation.

## Supplementary Tables

Supplemental table I. The volumetric analysis of minimal-reperfusion group (penumbra)

| Thresholds        | Mean magnitude (ml) | Mean difference (ml) | 95%LoA           |                  | r     | P value |
|-------------------|---------------------|----------------------|------------------|------------------|-------|---------|
|                   |                     |                      | Lower limit (ml) | Upper limit (ml) |       |         |
| DT>1s             | 76.2                | 75.7                 | -21.4            | 172.7            | 0.761 | <0.001  |
| DT>2s             | 44.9                | 36.1                 | -42.4            | 114.7            | 0.849 | <0.001  |
| DT>3s             | 29.1                | 7.1                  | -62.6            | 76.8             | 0.900 | <0.001  |
| DT>4s             | 30.5                | -15.6                | -94.4            | 63.3             | 0.879 | <0.001  |
| DT>5s             | 42.4                | -35.6                | -117.0           | 45.7             | 0.875 | <0.001  |
| DT>6s             | 54.2                | -49.7                | -138.1           | 38.6             | 0.861 | <0.001  |
| DT>7s             | 64.1                | -60.8                | -157.4           | 35.8             | 0.849 | <0.001  |
| DT>8s             | 72.6                | -70.0                | -172.9           | 32.9             | 0.837 | <0.001  |
| DT>9s             | 79.8                | -77.8                | -188.1           | 32.6             | 0.817 | <0.001  |
| DT>10s            | 85.9                | -84.5                | -202.0           | 33.0             | 0.790 | <0.001  |
| rCBF<20%          | 87.9                | -87.9                | -204.8           | 29.0             | 0.744 | <0.001  |
| rCBF<25%          | 77.9                | -77.9                | -185.0           | 29.2             | 0.784 | <0.001  |
| rCBF<30%          | 69.1                | -67.1                | -175.1           | 40.9             | 0.755 | <0.001  |
| rCBF<35%          | 59.5                | -52.9                | -158.5           | 52.7             | 0.755 | <0.001  |
| rCBF<40%          | 52.9                | -36.1                | -151.0           | 78.8             | 0.671 | 0.001   |
| rCBF<45%          | 43.8                | -18.9                | -126.5           | 88.8             | 0.715 | <0.001  |
| rCBF<50%          | 44.9                | -1.3                 | -116.8           | 114.3            | 0.647 | 0.001   |
| rCBF<55%          | 44.8                | 22.5                 | -83.7            | 128.7            | 0.708 | <0.001  |
| rCBF<60%          | 56.9                | 35.9                 | -82.8            | 154.6            | 0.614 | 0.002   |
| rCBF<70%          | 77.4                | 72.1                 | -45.3            | 189.5            | 0.625 | 0.002   |
| rCBF<80%          | 105.8               | 105.1                | -17.2            | 227.5            | 0.589 | 0.004   |
| CBF<2ml/100g/min  | 104.0               | -104.0               | -242.3           | 34.4             | 0.755 | <0.001  |
| CBF<4ml/100g/min  | 93.5                | -93.5                | -216.6           | 29.7             | 0.715 | <0.001  |
| CBF<6ml/100g/min  | 80.1                | -78.4                | -196.6           | 39.7             | 0.681 | <0.001  |
| CBF<8ml/100g/min  | 63.9                | -56.5                | -169.3           | 56.2             | 0.691 | <0.001  |
| CBF<10ml/100g/min | 50.1                | -22.5                | -135.7           | 90.7             | 0.662 | 0.001   |

|                   |       |        |        |       |       |        |
|-------------------|-------|--------|--------|-------|-------|--------|
| CBF<12ml/100g/min | 59.7  | 19.0   | -163.4 | 201.4 | 0.400 | 0.107  |
| CBF<14ml/100g/min | 65.1  | 47.1   | -123.7 | 217.8 | 0.425 | 0.049  |
| CBF<16ml/100g/min | 91.4  | 83.1   | -89.5  | 255.6 | 0.480 | 0.024  |
| CBF<18ml/100g/min | 119.8 | 114.3  | -66.4  | 295.0 | 0.445 | 0.038  |
| CBF<20ml/100g/min | 136.2 | 133.8  | -38.5  | 306.1 | 0.487 | 0.025  |
| rCBV<20%          | 90.2  | -88.2  | -210.9 | 34.6  | 0.746 | <0.001 |
| rCBV<30%          | 93.4  | -93.4  | -212.3 | 25.5  | 0.778 | <0.001 |
| rCBV<40%          | 82.2  | -81.1  | -198.5 | 36.2  | 0.720 | <0.001 |
| rCBV<50%          | 71.6  | -59.8  | -191.6 | 72.0  | 0.484 | 0.023  |
| rCBV<60%          | 61.8  | -32.6  | -177.6 | 112.4 | 0.400 | 0.101  |
| rCBV<70%          | 63.6  | -1.3   | -161.5 | 158.8 | 0.300 | 0.237  |
| rCBV<80%          | 71.1  | 27.4   | -139.2 | 194.1 | 0.200 | 0.264  |
| CBV<0.5ml/100g    | 100.0 | -100.0 | -229.3 | 29.2  | 0.714 | <.001  |
| CBV<1ml/100g      | 86.2  | -84.6  | -201.9 | 32.7  | 0.726 | <0.001 |
| CBV<1.5ml/100g    | 62.0  | -36.1  | -174.7 | 102.4 | 0.400 | 0.054  |
| CBV<2ml/100g      | 67.9  | 30.8   | -126.8 | 188.4 | 0.300 | 0.121  |
| CBV<2.5ml/100g    | 101.6 | 91.8   | -68.4  | 252.1 | 0.400 | 0.082  |
| CBV<3ml/100g      | 147.4 | 146.8  | -25.8  | 319.4 | 0.400 | 0.109  |
| CBV<3.5ml/100g    | 172.2 | 172.2  | 15.5   | 328.9 | 0.465 | 0.029  |
| CBV<4ml/100g      | 196.9 | 196.9  | 39.5   | 354.3 | 0.445 | 0.038  |
| CBV<4.5ml/100g    | 205.9 | 205.9  | 51.2   | 360.6 | 0.491 | 0.020  |
| CBV<5ml/100g      | 224.3 | 224.3  | 68.6   | 380.0 | 0.455 | 0.033  |
| rMTT>125%         | 110.6 | 110.6  | -28.3  | 249.6 | 0.585 | 0.004  |
| rMTT>150%         | 49.4  | 29.7   | -105.6 | 164.9 | 0.631 | 0.002  |
| rMTT>175%         | 45.2  | -20.6  | -131.7 | 90.6  | 0.685 | <0.001 |
| rMTT>200%         | 62.1  | -56.3  | -172.0 | 59.4  | 0.674 | 0.001  |
| rMTT>225%         | 84.1  | -84.1  | -216.4 | 48.3  | 0.608 | 0.003  |
| rMTT>250%         | 97.9  | -97.9  | -242.1 | 46.3  | 0.400 | 0.053  |
| MTT>5s            | 241.6 | 241.6  | 94.5   | 388.7 | 0.523 | 0.012  |
| MTT>7s            | 154.9 | 154.9  | -3.2   | 312.9 | 0.608 | 0.003  |
| MTT>9s            | 69.0  | 48.2   | -122.3 | 218.8 | 0.584 | 0.004  |
| MTT>11s           | 49.8  | -22.3  | -156.2 | 111.6 | 0.583 | 0.004  |
| MTT>13s           | 69.8  | -66.6  | -191.5 | 58.4  | 0.569 | 0.006  |

|         |      |       |        |      |       |       |
|---------|------|-------|--------|------|-------|-------|
| MTT>15s | 86.8 | -86.8 | -215.7 | 42.1 | 0.566 | 0.006 |
|---------|------|-------|--------|------|-------|-------|

---

Supplemental table II. The volumetric analysis of major reperfusion group (ischemic core)

| Thresholds        | Mean magnitude (ml) | Mean difference (ml) | 95% LoA          |                  | r     | P value |
|-------------------|---------------------|----------------------|------------------|------------------|-------|---------|
|                   |                     |                      | Lower limit (ml) | Upper limit (ml) |       |         |
| DT>1s             | 96.3                | 96.3                 | -1.0             | 193.7            | 0.573 | <0.001  |
| DT>2s             | 66.7                | 66.5                 | -17.2            | 150.2            | 0.663 | <0.001  |
| DT>3s             | 47.6                | 46.4                 | -27.0            | 119.7            | 0.721 | <0.001  |
| DT>4s             | 32.2                | 28.9                 | -32.9            | 90.7             | 0.761 | <0.001  |
| DT>5s             | 23.2                | 15.2                 | -38.3            | 68.7             | 0.776 | <0.001  |
| DT>6s             | 19.2                | 4.4                  | -43.1            | 51.9             | 0.775 | <0.001  |
| DT>7s             | 17.6                | -4.6                 | -50.6            | 41.3             | 0.752 | <0.001  |
| DT>8s             | 17.3                | -11.3                | -52.8            | 30.2             | 0.788 | <0.001  |
| DT>9s             | 19.5                | -16.3                | -59.5            | 26.9             | 0.769 | <0.001  |
| DT>10s            | 22.3                | -20.6                | -66.8            | 25.6             | 0.737 | <0.001  |
| rCBF<20%          | 20.3                | -19.1                | -57.6            | 19.5             | 0.861 | <0.001  |
| rCBF<25%          | 16.4                | -12.8                | -47.2            | 21.6             | 0.865 | <0.001  |
| rCBF<30%          | 10.8                | -0.4                 | -32.5            | 31.6             | 0.881 | <0.001  |
| rCBF<35%          | 18.4                | 13.7                 | -30.3            | 57.7             | 0.784 | <0.001  |
| rCBF<40%          | 34.5                | 34.0                 | -14.7            | 82.7             | 0.777 | <0.001  |
| rCBF<45%          | 50.9                | 50.9                 | -4.7             | 106.5            | 0.723 | <0.001  |
| rCBF<50%          | 69.9                | 69.9                 | 2.8              | 137.0            | 0.682 | <0.001  |
| rCBF<55%          | 85.5                | 85.5                 | 12.3             | 158.7            | 0.621 | <0.001  |
| rCBF<60%          | 104.3               | 104.3                | 25.8             | 182.8            | 0.606 | <0.001  |
| rCBF<70%          | 139.2               | 139.2                | 51.7             | 226.7            | 0.536 | <0.001  |
| rCBF<80%          | 172.4               | 172.4                | 76.2             | 268.6            | 0.463 | 0.001   |
| CBF<2ml/100g/min  | 31.6                | -31.6                | -90.3            | 27.0             | 0.602 | <0.001  |
| CBF<4ml/100g/min  | 24.4                | -24.1                | -72.5            | 24.3             | 0.728 | <0.001  |
| CBF<6ml/100g/min  | 19.4                | -9.5                 | -58.0            | 39.0             | 0.716 | <0.001  |
| CBF<8ml/100g/min  | 28.4                | 13.5                 | -60.4            | 87.4             | 0.555 | <0.001  |
| CBF<10ml/100g/min | 45.5                | 40.8                 | -49.6            | 131.2            | 0.466 | 0.001   |
| CBF<12ml/100g/min | 80.0                | 78.7                 | -71.3            | 228.8            | 0.249 | 0.092   |

|                   |       |       |        |       |       |        |
|-------------------|-------|-------|--------|-------|-------|--------|
| CBF<14ml/100g/min | 106.7 | 106.6 | -46.3  | 259.5 | 0.252 | 0.088  |
| CBF<16ml/100g/min | 134.7 | 134.7 | -28.8  | 298.2 | 0.217 | 0.143  |
| CBF<18ml/100g/min | 160.3 | 160.3 | -10.6  | 331.3 | 0.198 | 0.182  |
| CBF<20ml/100g/min | 186.5 | 186.5 | 2.8    | 370.2 | 0.133 | 0.372  |
| rCBV<20%          | 30.8  | -30.7 | -85.9  | 24.6  | 0.686 | <0.001 |
| rCBV<30%          | 28.1  | -26.7 | -77.5  | 24.0  | 0.747 | <0.001 |
| rCBV<40%          | 21.2  | -13.3 | -63.6  | 37.0  | 0.671 | <0.001 |
| rCBV<50%          | 24.7  | 10.9  | -49.1  | 70.8  | 0.530 | <0.001 |
| rCBV<60%          | 45.0  | 41.4  | -30.7  | 113.6 | 0.432 | 0.002  |
| rCBV<70%          | 78.2  | 76.5  | -14.5  | 167.5 | 0.347 | 0.017  |
| rCBV<80%          | 110.8 | 109.9 | 9.0    | 210.8 | 0.314 | 0.032  |
| CBV<0.5ml/100g    | 30.4  | -30.2 | -84.6  | 24.1  | 0.682 | <0.001 |
| CBV<1ml/100g      | 22.5  | -12.9 | -68.7  | 42.8  | 0.566 | <0.001 |
| CBV<1.5ml/100g    | 52.3  | 44.5  | -55.6  | 144.5 | 0.258 | 0.080  |
| CBV<2ml/100g      | 112.7 | 112.1 | -24.4  | 248.7 | 0.179 | 0.228  |
| CBV<2.5ml/100g    | 167.2 | 167.2 | 17.9   | 316.5 | 0.113 | 0.451  |
| CBV<3ml/100g      | 206.2 | 206.2 | 56.5   | 356.0 | 0.118 | 0.429  |
| CBV<3.5ml/100g    | 232.6 | 232.6 | 86.7   | 378.6 | 0.070 | 0.641  |
| CBV<4ml/100g      | 253.2 | 253.2 | 113.3  | 393.0 | 0.083 | 0.580  |
| CBV<4.5ml/100g    | 264.6 | 264.6 | 126.1  | 403.1 | 0.052 | 0.729  |
| CBV<5ml/100g      | 275.1 | 275.1 | 139.3  | 410.9 | 0.071 | 0.636  |
| rMTT>125%         | 144.3 | 144.3 | 21.9   | 266.8 | 0.615 | <0.001 |
| rMTT>150%         | 67.4  | 67.1  | -33.2  | 167.3 | 0.722 | <0.001 |
| rMTT>175%         | 31.9  | 27.4  | -51.3  | 106.2 | 0.720 | <0.001 |
| rMTT>200%         | 18.4  | 5.5   | -51.3  | 62.3  | 0.743 | <0.001 |
| rMTT>225%         | 19.5  | -13.9 | -67.4  | 39.6  | 0.624 | <0.001 |
| rMTT>250%         | 26.1  | -24.1 | -81.5  | 33.3  | 0.522 | <0.001 |
| MTT>5s            | 296.6 | 296.6 | 174.9  | 418.3 | 0.140 | 0.348  |
| MTT>7s            | 180.4 | 180.4 | 10.5   | 350.2 | 0.297 | 0.042  |
| MTT>9s            | 85.3  | 83.4  | -84.8  | 251.6 | 0.364 | 0.012  |
| MTT>11s           | 42.0  | 30.5  | -107.3 | 168.3 | 0.324 | 0.026  |
| MTT>13s           | 27.0  | -1.2  | -94.1  | 91.8  | 0.348 | 0.017  |

|         |      |       |       |      |       |       |
|---------|------|-------|-------|------|-------|-------|
| MTT>15s | 26.8 | -20.0 | -89.2 | 49.1 | 0.310 | 0.034 |
|---------|------|-------|-------|------|-------|-------|

---



Supplemental table III. ROC analysis results of minimal-reperfusion group

| Thresholds        | Sensitivity | Specificity | Youden's index |
|-------------------|-------------|-------------|----------------|
| DT>1s             | 0.91        | 0.39        | 0.30           |
| DT>2s             | 0.83        | 0.61        | 0.45           |
| DT>3s             | 0.75        | 0.74        | 0.49           |
| DT>4s             | 0.66        | 0.83        | 0.49           |
| DT>5s             | 0.58        | 0.88        | 0.46           |
| DT>6s             | 0.50        | 0.92        | 0.42           |
| DT>7s             | 0.42        | 0.94        | 0.36           |
| DT>8s             | 0.35        | 0.96        | 0.31           |
| DT>9s             | 0.29        | 0.97        | 0.26           |
| DT>10s            | 0.23        | 0.98        | 0.21           |
| rCBF<20%          | 0.25        | 0.98        | 0.23           |
| rCBF<25%          | 0.34        | 0.96        | 0.30           |
| rCBF<30%          | 0.41        | 0.93        | 0.34           |
| rCBF<35%          | 0.47        | 0.89        | 0.36           |
| rCBF<40%          | 0.53        | 0.85        | 0.38           |
| rCBF<45%          | 0.59        | 0.79        | 0.38           |
| rCBF<50%          | 0.64        | 0.74        | 0.38           |
| rCBF<55%          | 0.69        | 0.69        | 0.38           |
| rCBF<60%          | 0.73        | 0.63        | 0.36           |
| rCBF<70%          | 0.80        | 0.53        | 0.33           |
| rCBF<80%          | 0.85        | 0.43        | 0.28           |
| CBF<2ml/100g/min  | 0.08        | 1.00        | 0.08           |
| CBF<4ml/100g/min  | 0.21        | 0.98        | 0.20           |
| CBF<6ml/100g/min  | 0.35        | 0.94        | 0.29           |
| CBF<8ml/100g/min  | 0.47        | 0.88        | 0.34           |
| CBF<10ml/100g/min | 0.57        | 0.79        | 0.36           |
| CBF<12ml/100g/min | 0.65        | 0.70        | 0.36           |
| CBF<14ml/100g/min | 0.73        | 0.62        | 0.34           |
| CBF<16ml/100g/min | 0.78        | 0.53        | 0.31           |
| CBF<18ml/100g/min | 0.83        | 0.45        | 0.28           |

|                   |      |      |      |
|-------------------|------|------|------|
| CBF<20ml/100g/min | 0.86 | 0.38 | 0.24 |
| rCBV<20%          | 0.10 | 0.98 | 0.08 |
| rCBV<30%          | 0.16 | 0.96 | 0.12 |
| rCBV<40%          | 0.25 | 0.9  | 0.15 |
| rCBV<50%          | 0.34 | 0.83 | 0.17 |
| rCBV<60%          | 0.44 | 0.74 | 0.18 |
| rCBV<70%          | 0.52 | 0.65 | 0.17 |
| rCBV<80%          | 0.61 | 0.57 | 0.18 |
| CBV<0.5ml/100g    | 0.11 | 0.98 | 0.09 |
| CBV<1ml/100g      | 0.26 | 0.89 | 0.15 |
| CBV<1.5ml/100g    | 0.44 | 0.73 | 0.17 |
| CBV<2ml/100g      | 0.61 | 0.55 | 0.16 |
| CBV<2.5ml/100g    | 0.75 | 0.38 | 0.12 |
| CBV<3ml/100g      | 0.84 | 0.24 | 0.09 |
| CBV<3.5ml/100g    | 0.91 | 0.14 | 0.06 |
| CBV<4ml/100g      | 0.96 | 0.07 | 0.03 |
| CBV<4.5ml/100g    | 0.99 | 0.02 | 0.01 |
| CBV<5ml/100g      | 1.00 | 0.01 | 0.00 |
| rMTT>125%         | 0.87 | 0.47 | 0.34 |
| rMTT>150%         | 0.73 | 0.72 | 0.45 |
| rMTT>175%         | 0.55 | 0.86 | 0.41 |
| rMTT>200%         | 0.39 | 0.93 | 0.32 |
| rMTT>225%         | 0.26 | 0.97 | 0.23 |
| rMTT>250%         | 0.16 | 0.98 | 0.14 |
| MTT>5s            | 0.98 | 0.07 | 0.04 |
| MTT>7s            | 0.90 | 0.36 | 0.26 |
| MTT>9s            | 0.74 | 0.68 | 0.43 |
| MTT>11s           | 0.53 | 0.87 | 0.40 |
| MTT>13s           | 0.34 | 0.95 | 0.28 |
| MTT>15s           | 0.19 | 0.98 | 0.17 |

---

Supplemental table IV. ROC analysis results of major-reperfusion group

| Thresholds        | Sensitivity | Specificity | Youden's index |
|-------------------|-------------|-------------|----------------|
| DT>1s             | 0.99        | 0.02        | 0.01           |
| DT>2s             | 0.96        | 0.07        | 0.03           |
| DT>3s             | 0.92        | 0.15        | 0.07           |
| DT>4s             | 0.85        | 0.31        | 0.16           |
| DT>5s             | 0.75        | 0.48        | 0.23           |
| DT>6s             | 0.66        | 0.61        | 0.27           |
| DT>7s             | 0.57        | 0.71        | 0.28           |
| DT>8s             | 0.48        | 0.79        | 0.27           |
| DT>9s             | 0.40        | 0.85        | 0.25           |
| DT>10s            | 0.33        | 0.89        | 0.22           |
| rCBF<20%          | 0.46        | 0.90        | 0.36           |
| rCBF<25%          | 0.56        | 0.84        | 0.39           |
| rCBF<30%          | 0.64        | 0.76        | 0.40           |
| rCBF<35%          | 0.71        | 0.68        | 0.39           |
| rCBF<40%          | 0.76        | 0.60        | 0.36           |
| rCBF<45%          | 0.80        | 0.53        | 0.33           |
| rCBF<50%          | 0.83        | 0.47        | 0.30           |
| rCBF<55%          | 0.86        | 0.41        | 0.27           |
| rCBF<60%          | 0.88        | 0.36        | 0.24           |
| rCBF<70%          | 0.92        | 0.27        | 0.19           |
| rCBF<80%          | 0.94        | 0.20        | 0.14           |
| CBF<2ml/100g/min  | 0.17        | 0.98        | 0.15           |
| CBF<4ml/100g/min  | 0.38        | 0.91        | 0.29           |
| CBF<6ml/100g/min  | 0.55        | 0.81        | 0.36           |
| CBF<8ml/100g/min  | 0.66        | 0.69        | 0.36           |
| CBF<10ml/100g/min | 0.74        | 0.59        | 0.33           |
| CBF<12ml/100g/min | 0.80        | 0.49        | 0.29           |
| CBF<14ml/100g/min | 0.84        | 0.41        | 0.25           |
| CBF<16ml/100g/min | 0.88        | 0.34        | 0.21           |
| CBF<18ml/100g/min | 0.90        | 0.28        | 0.18           |

|                   |      |      |      |
|-------------------|------|------|------|
| CBF<20ml/100g/min | 0.92 | 0.23 | 0.15 |
| rCBV<20%          | 0.15 | 0.97 | 0.12 |
| rCBV<30%          | 0.25 | 0.94 | 0.19 |
| rCBV<40%          | 0.38 | 0.87 | 0.25 |
| rCBV<50%          | 0.49 | 0.78 | 0.27 |
| rCBV<60%          | 0.59 | 0.68 | 0.27 |
| rCBV<70%          | 0.69 | 0.56 | 0.25 |
| rCBV<80%          | 0.76 | 0.47 | 0.22 |
| CBV<0.5ml/100g    | 0.17 | 0.96 | 0.14 |
| CBV<1ml/100g      | 0.40 | 0.86 | 0.26 |
| CBV<1.5ml/100g    | 0.61 | 0.66 | 0.27 |
| CBV<2ml/100g      | 0.76 | 0.47 | 0.23 |
| CBV<2.5ml/100g    | 0.85 | 0.31 | 0.16 |
| CBV<3ml/100g      | 0.91 | 0.19 | 0.10 |
| CBV<3.5ml/100g    | 0.95 | 0.11 | 0.06 |
| CBV<4ml/100g      | 0.97 | 0.06 | 0.03 |
| CBV<4.5ml/100g    | 0.99 | 0.02 | 0.01 |
| CBV<5ml/100g      | 1.00 | 0.01 | 0.00 |
| rMTT>125%         | 0.94 | 0.17 | 0.10 |
| rMTT>150%         | 0.85 | 0.33 | 0.18 |
| rMTT>175%         | 0.65 | 0.56 | 0.21 |
| rMTT>200%         | 0.53 | 0.66 | 0.20 |
| rMTT>225%         | 0.37 | 0.79 | 0.16 |
| rMTT>250%         | 0.27 | 0.85 | 0.12 |
| MTT>5s            | 0.98 | 0.05 | 0.03 |
| MTT>7s            | 0.92 | 0.20 | 0.12 |
| MTT>9s            | 0.77 | 0.43 | 0.20 |
| MTT>11s           | 0.58 | 0.65 | 0.23 |
| MTT>13s           | 0.41 | 0.79 | 0.20 |
| MTT>15s           | 0.25 | 0.88 | 0.13 |

---

Supplemental table V. separate ROC analysis results of minimal-reperfusion group (24hr MRP)

| Thresholds        | Sensitivity | Specificity | Youden's index |
|-------------------|-------------|-------------|----------------|
| DT>1s             | 0.91        | 0.41        | 0.31           |
| DT>2s             | 0.81        | 0.62        | 0.44           |
| DT>3s             | 0.72        | 0.75        | 0.47           |
| DT>4s             | 0.63        | 0.84        | 0.47           |
| DT>5s             | 0.55        | 0.89        | 0.44           |
| DT>6s             | 0.47        | 0.93        | 0.40           |
| DT>7s             | 0.39        | 0.95        | 0.34           |
| DT>8s             | 0.32        | 0.97        | 0.29           |
| DT>9s             | 0.27        | 0.98        | 0.25           |
| DT>10s            | 0.22        | 0.99        | 0.20           |
| rCBF<20%          | 0.22        | 0.99        | 0.21           |
| rCBF<25%          | 0.31        | 0.97        | 0.28           |
| rCBF<30%          | 0.39        | 0.93        | 0.32           |
| rCBF<35%          | 0.45        | 0.90        | 0.34           |
| rCBF<40%          | 0.50        | 0.85        | 0.35           |
| rCBF<45%          | 0.56        | 0.80        | 0.37           |
| rCBF<50%          | 0.62        | 0.75        | 0.37           |
| rCBF<55%          | 0.67        | 0.70        | 0.37           |
| rCBF<60%          | 0.70        | 0.64        | 0.34           |
| rCBF<70%          | 0.78        | 0.54        | 0.32           |
| rCBF<80%          | 0.84        | 0.44        | 0.28           |
| CBF<2ml/100g/min  | 0.09        | 1.00        | 0.09           |
| CBF<4ml/100g/min  | 0.23        | 0.98        | 0.21           |
| CBF<6ml/100g/min  | 0.37        | 0.94        | 0.31           |
| CBF<8ml/100g/min  | 0.49        | 0.87        | 0.35           |
| CBF<10ml/100g/min | 0.58        | 0.78        | 0.37           |
| CBF<12ml/100g/min | 0.67        | 0.69        | 0.36           |
| CBF<14ml/100g/min | 0.73        | 0.60        | 0.34           |
| CBF<16ml/100g/min | 0.79        | 0.52        | 0.31           |

|                   |      |      |      |
|-------------------|------|------|------|
| CBF<18ml/100g/min | 0.83 | 0.44 | 0.27 |
| CBF<20ml/100g/min | 0.87 | 0.36 | 0.23 |
| rCBV<20%          | 0.12 | 0.98 | 0.10 |
| rCBV<30%          | 0.18 | 0.96 | 0.14 |
| rCBV<40%          | 0.27 | 0.90 | 0.17 |
| rCBV<50%          | 0.36 | 0.83 | 0.19 |
| rCBV<60%          | 0.45 | 0.74 | 0.19 |
| rCBV<70%          | 0.54 | 0.65 | 0.19 |
| rCBV<80%          | 0.61 | 0.56 | 0.18 |
| CBV<0.5ml/100g    | 0.12 | 0.98 | 0.10 |
| CBV<1ml/100g      | 0.28 | 0.88 | 0.16 |
| CBV<1.5ml/100g    | 0.46 | 0.72 | 0.18 |
| CBV<2ml/100g      | 0.63 | 0.53 | 0.16 |
| CBV<2.5ml/100g    | 0.75 | 0.37 | 0.12 |
| CBV<3ml/100g      | 0.84 | 0.24 | 0.08 |
| CBV<3.5ml/100g    | 0.91 | 0.14 | 0.05 |
| CBV<4ml/100g      | 0.95 | 0.08 | 0.03 |
| CBV<4.5ml/100g    | 0.98 | 0.03 | 0.02 |
| CBV<5ml/100g      | 1.00 | 0.01 | 0.00 |
| rMTT>125%         | 0.87 | 0.46 | 0.33 |
| rMTT>150%         | 0.75 | 0.68 | 0.42 |
| rMTT>175%         | 0.53 | 0.87 | 0.40 |
| rMTT>200%         | 0.40 | 0.93 | 0.33 |
| rMTT>225%         | 0.24 | 0.97 | 0.21 |
| rMTT>250%         | 0.16 | 0.99 | 0.15 |
| MTT>5s            | 0.98 | 0.07 | 0.04 |
| MTT>7s            | 0.90 | 0.36 | 0.26 |
| MTT>9s            | 0.73 | 0.67 | 0.41 |
| MTT>11s           | 0.51 | 0.87 | 0.38 |
| MTT>13s           | 0.33 | 0.95 | 0.27 |
| MTT>15s           | 0.18 | 0.98 | 0.17 |

Supplemental table VI. Separate ROC analysis of minimal-reperfusion group (24hr CTP, penumbra)

| Thresholds        | Sensitivity | Specificity | Youden's index |
|-------------------|-------------|-------------|----------------|
| DT>1s             | 0.92        | 0.37        | 0.29           |
| DT>2s             | 0.86        | 0.60        | 0.46           |
| DT>3s             | 0.80        | 0.72        | 0.52           |
| DT>4s             | 0.72        | 0.80        | 0.52           |
| DT>5s             | 0.64        | 0.87        | 0.51           |
| DT>6s             | 0.55        | 0.90        | 0.45           |
| DT>7s             | 0.47        | 0.93        | 0.40           |
| DT>8s             | 0.39        | 0.95        | 0.34           |
| DT>9s             | 0.32        | 0.96        | 0.28           |
| DT>10s            | 0.26        | 0.97        | 0.23           |
| rCBF<20%          | 0.23        | 0.98        | 0.21           |
| rCBF<25%          | 0.32        | 0.96        | 0.28           |
| rCBF<30%          | 0.40        | 0.92        | 0.32           |
| rCBF<35%          | 0.47        | 0.88        | 0.35           |
| rCBF<40%          | 0.54        | 0.83        | 0.37           |
| rCBF<45%          | 0.59        | 0.78        | 0.37           |
| rCBF<50%          | 0.65        | 0.72        | 0.37           |
| rCBF<55%          | 0.70        | 0.67        | 0.37           |
| rCBF<60%          | 0.74        | 0.61        | 0.35           |
| rCBF<70%          | 0.81        | 0.51        | 0.32           |
| rCBF<80%          | 0.87        | 0.40        | 0.27           |
| CBF<2ml/100g/min  | 0.04        | 1.00        | 0.04           |
| CBF<4ml/100g/min  | 0.16        | 0.99        | 0.16           |
| CBF<6ml/100g/min  | 0.30        | 0.97        | 0.27           |
| CBF<8ml/100g/min  | 0.43        | 0.91        | 0.34           |
| CBF<10ml/100g/min | 0.53        | 0.83        | 0.37           |
| CBF<12ml/100g/min | 0.62        | 0.75        | 0.36           |
| CBF<14ml/100g/min | 0.69        | 0.66        | 0.34           |

|                   |      |      |      |
|-------------------|------|------|------|
| CBF<16ml/100g/min | 0.74 | 0.57 | 0.31 |
| CBF<18ml/100g/min | 0.80 | 0.48 | 0.28 |
| CBF<20ml/100g/min | 0.84 | 0.40 | 0.24 |
| rCBV<20%          | 0.08 | 0.98 | 0.06 |
| rCBV<30%          | 0.14 | 0.96 | 0.10 |
| rCBV<40%          | 0.23 | 0.90 | 0.13 |
| rCBV<50%          | 0.32 | 0.84 | 0.16 |
| rCBV<60%          | 0.43 | 0.75 | 0.18 |
| rCBV<70%          | 0.52 | 0.67 | 0.19 |
| rCBV<80%          | 0.61 | 0.57 | 0.18 |
| CBV<0.5ml/100g    | 0.06 | 0.99 | 0.05 |
| CBV<1ml/100g      | 0.19 | 0.94 | 0.13 |
| CBV<1.5ml/100g    | 0.36 | 0.81 | 0.17 |
| CBV<2ml/100g      | 0.53 | 0.64 | 0.17 |
| CBV<2.5ml/100g    | 0.69 | 0.46 | 0.15 |
| CBV<3ml/100g      | 0.81 | 0.31 | 0.12 |
| CBV<3.5ml/100g    | 0.89 | 0.20 | 0.08 |
| CBV<4ml/100g      | 0.94 | 0.11 | 0.05 |
| CBV<4.5ml/100g    | 0.97 | 0.05 | 0.02 |
| CBV<5ml/100g      | 1.00 | 0.01 | 0.00 |
| rMTT>125%         | 0.87 | 0.49 | 0.36 |
| rMTT>150%         | 0.75 | 0.72 | 0.47 |
| rMTT>175%         | 0.59 | 0.85 | 0.44 |
| rMTT>200%         | 0.43 | 0.91 | 0.34 |
| rMTT>225%         | 0.29 | 0.95 | 0.24 |
| rMTT>250%         | 0.18 | 0.97 | 0.15 |
| MTT>5s            | 0.98 | 0.06 | 0.04 |
| MTT>7s            | 0.90 | 0.37 | 0.27 |
| MTT>9s            | 0.76 | 0.71 | 0.47 |
| MTT>11s           | 0.56 | 0.87 | 0.43 |
| MTT>13s           | 0.36 | 0.95 | 0.31 |



MTT>15s

0.20

0.97

0.17

---

Supplemental table VII. Separate ROC analysis results of major reperfusion group (24hr MRI, ischemic core)

| Thresholds        | Sensitivity | Specificity | Youden's index |
|-------------------|-------------|-------------|----------------|
| DT>1s             | 0.98        | 0.03        | 0.01           |
| DT>2s             | 0.95        | 0.07        | 0.02           |
| DT>3s             | 0.91        | 0.15        | 0.05           |
| DT>4s             | 0.83        | 0.31        | 0.14           |
| DT>5s             | 0.73        | 0.48        | 0.22           |
| DT>6s             | 0.63        | 0.61        | 0.24           |
| DT>7s             | 0.53        | 0.71        | 0.25           |
| DT>8s             | 0.44        | 0.80        | 0.23           |
| DT>9s             | 0.36        | 0.86        | 0.22           |
| DT>10s            | 0.29        | 0.91        | 0.20           |
| rCBF<20%          | 0.42        | 0.92        | 0.33           |
| rCBF<25%          | 0.51        | 0.86        | 0.37           |
| rCBF<30%          | 0.61        | 0.78        | 0.39           |
| rCBF<35%          | 0.68        | 0.70        | 0.38           |
| rCBF<40%          | 0.74        | 0.60        | 0.34           |
| rCBF<45%          | 0.77        | 0.54        | 0.31           |
| rCBF<50%          | 0.81        | 0.47        | 0.28           |
| rCBF<55%          | 0.84        | 0.42        | 0.26           |
| rCBF<60%          | 0.87        | 0.37        | 0.24           |
| rCBF<70%          | 0.90        | 0.28        | 0.19           |
| rCBF<80%          | 0.93        | 0.21        | 0.14           |
| CBF<2ml/100g/min  | 0.17        | 0.98        | 0.14           |
| CBF<4ml/100g/min  | 0.38        | 0.92        | 0.30           |
| CBF<6ml/100g/min  | 0.54        | 0.82        | 0.36           |
| CBF<8ml/100g/min  | 0.65        | 0.71        | 0.36           |
| CBF<10ml/100g/min | 0.72        | 0.60        | 0.33           |
| CBF<12ml/100g/min | 0.78        | 0.50        | 0.28           |
| CBF<14ml/100g/min | 0.82        | 0.42        | 0.25           |
| CBF<16ml/100g/min | 0.86        | 0.35        | 0.21           |

|                   |      |      |      |
|-------------------|------|------|------|
| CBF<18ml/100g/min | 0.88 | 0.30 | 0.18 |
| CBF<20ml/100g/min | 0.91 | 0.25 | 0.16 |
| rCBV<20%          | 0.16 | 0.97 | 0.13 |
| rCBV<30%          | 0.26 | 0.94 | 0.20 |
| rCBV<40%          | 0.39 | 0.87 | 0.26 |
| rCBV<50%          | 0.51 | 0.77 | 0.28 |
| rCBV<60%          | 0.61 | 0.65 | 0.26 |
| rCBV<70%          | 0.69 | 0.54 | 0.23 |
| rCBV<80%          | 0.76 | 0.44 | 0.20 |
| CBV<0.5ml/100g    | 0.18 | 0.97 | 0.15 |
| CBV<1ml/100g      | 0.42 | 0.85 | 0.27 |
| CBV<1.5ml/100g    | 0.63 | 0.64 | 0.27 |
| CBV<2ml/100g      | 0.77 | 0.44 | 0.21 |
| CBV<2.5ml/100g    | 0.85 | 0.30 | 0.15 |
| CBV<3ml/100g      | 0.91 | 0.19 | 0.10 |
| CBV<3.5ml/100g    | 0.94 | 0.12 | 0.06 |
| CBV<4ml/100g      | 0.97 | 0.06 | 0.03 |
| CBV<4.5ml/100g    | 0.99 | 0.03 | 0.01 |
| CBV<5ml/100g      | 1.00 | 0.00 | 0.00 |
| rMTT>125%         | 0.91 | 0.22 | 0.14 |
| rMTT>150%         | 0.82 | 0.40 | 0.21 |
| rMTT>175%         | 0.64 | 0.62 | 0.26 |
| rMTT>200%         | 0.52 | 0.73 | 0.25 |
| rMTT>225%         | 0.35 | 0.84 | 0.19 |
| rMTT>250%         | 0.24 | 0.89 | 0.13 |
| MTT>5s            | 0.98 | 0.04 | 0.02 |
| MTT>7s            | 0.89 | 0.24 | 0.13 |
| MTT>9s            | 0.70 | 0.48 | 0.18 |
| MTT>11s           | 0.52 | 0.69 | 0.20 |
| MTT>13s           | 0.36 | 0.82 | 0.18 |
| MTT>15s           | 0.21 | 0.91 | 0.12 |

Supplemental table VIII. Separate ROC analysis results of major reperfusion group (24hr CTP, ischemic core)

| Thresholds        | Sensitivity | Specificity | Youden's index |
|-------------------|-------------|-------------|----------------|
| DT>1s             | 0.99        | 0.02        | 0.01           |
| DT>2s             | 0.97        | 0.07        | 0.04           |
| DT>3s             | 0.93        | 0.16        | 0.09           |
| DT>4s             | 0.86        | 0.31        | 0.17           |
| DT>5s             | 0.78        | 0.47        | 0.24           |
| DT>6s             | 0.69        | 0.60        | 0.29           |
| DT>7s             | 0.60        | 0.70        | 0.31           |
| DT>8s             | 0.52        | 0.78        | 0.30           |
| DT>9s             | 0.45        | 0.83        | 0.28           |
| DT>10s            | 0.38        | 0.87        | 0.25           |
| rCBF<20%          | 0.41        | 0.89        | 0.30           |
| rCBF<25%          | 0.53        | 0.82        | 0.35           |
| rCBF<30%          | 0.61        | 0.75        | 0.36           |
| rCBF<35%          | 0.69        | 0.66        | 0.35           |
| rCBF<40%          | 0.75        | 0.60        | 0.34           |
| rCBF<45%          | 0.79        | 0.53        | 0.32           |
| rCBF<50%          | 0.83        | 0.46        | 0.29           |
| rCBF<55%          | 0.86        | 0.40        | 0.26           |
| rCBF<60%          | 0.88        | 0.35        | 0.23           |
| rCBF<70%          | 0.92        | 0.25        | 0.17           |
| rCBF<80%          | 0.94        | 0.18        | 0.12           |
| CBF<2ml/100g/min  | 0.17        | 0.97        | 0.14           |
| CBF<4ml/100g/min  | 0.38        | 0.90        | 0.29           |
| CBF<6ml/100g/min  | 0.56        | 0.79        | 0.35           |
| CBF<8ml/100g/min  | 0.67        | 0.68        | 0.35           |
| CBF<10ml/100g/min | 0.76        | 0.57        | 0.33           |
| CBF<12ml/100g/min | 0.82        | 0.48        | 0.29           |
| CBF<14ml/100g/min | 0.86        | 0.39        | 0.25           |
| CBF<16ml/100g/min | 0.89        | 0.32        | 0.21           |

|                   |      |      |      |
|-------------------|------|------|------|
| CBF<18ml/100g/min | 0.92 | 0.26 | 0.18 |
| CBF<20ml/100g/min | 0.94 | 0.21 | 0.14 |
| rCBV<20%          | 0.14 | 0.96 | 0.10 |
| rCBV<30%          | 0.23 | 0.93 | 0.16 |
| rCBV<40%          | 0.36 | 0.88 | 0.23 |
| rCBV<50%          | 0.48 | 0.80 | 0.28 |
| rCBV<60%          | 0.57 | 0.71 | 0.28 |
| rCBV<70%          | 0.68 | 0.60 | 0.28 |
| rCBV<80%          | 0.75 | 0.50 | 0.25 |
| CBV<0.5ml/100g    | 0.16 | 0.96 | 0.12 |
| CBV<1ml/100g      | 0.37 | 0.87 | 0.24 |
| CBV<1.5ml/100g    | 0.59 | 0.70 | 0.29 |
| CBV<2ml/100g      | 0.74 | 0.51 | 0.25 |
| CBV<2.5ml/100g    | 0.84 | 0.34 | 0.18 |
| CBV<3ml/100g      | 0.91 | 0.21 | 0.12 |
| CBV<3.5ml/100g    | 0.95 | 0.12 | 0.07 |
| CBV<4ml/100g      | 0.97 | 0.07 | 0.04 |
| CBV<4.5ml/100g    | 0.99 | 0.03 | 0.02 |
| CBV<5ml/100g      | 1.00 | 0.00 | 0.00 |
| rMTT>125%         | 0.97 | 0.26 | 0.22 |
| rMTT>150%         | 0.92 | 0.41 | 0.33 |
| rMTT>175%         | 0.76 | 0.59 | 0.35 |
| rMTT>200%         | 0.65 | 0.67 | 0.33 |
| rMTT>225%         | 0.48 | 0.79 | 0.27 |
| rMTT>250%         | 0.37 | 0.84 | 0.22 |
| MTT>5s            | 0.99 | 0.05 | 0.04 |
| MTT>7s            | 0.95 | 0.15 | 0.10 |
| MTT>9s            | 0.84 | 0.37 | 0.22 |
| MTT>11s           | 0.65 | 0.59 | 0.24 |
| MTT>13s           | 0.45 | 0.75 | 0.21 |
| MTT>15s           | 0.28 | 0.85 | 0.13 |

---

Supplemental table IX. ROC analysis of each parameter (minimal-reperfusion group)

| Parameter | AUC   | 95%CI       |             |
|-----------|-------|-------------|-------------|
|           |       | Lower bound | Upper bound |
| DT        | 0.813 | 0.812       | 0.814       |
| rCBF      | 0.762 | 0.761       | 0.763       |
| CBF       | 0.752 | 0.751       | 0.753       |
| rCBV      | 0.625 | 0.623       | 0.626       |
| CBV       | 0.626 | 0.625       | 0.627       |
| rMTT      | 0.782 | 0.781       | 0.783       |
| MTT       | 0.760 | 0.759       | 0.761       |

Supplemental table X. ROC analysis of each parameter (major reperfusion group)

| Parameter | AUC   | 95%CI       |             |
|-----------|-------|-------------|-------------|
|           |       | Lower bound | Upper bound |
| DT        | 0.680 | 0.678       | 0.681       |
| rCBF      | 0.758 | 0.757       | 0.76        |
| CBF       | 0.735 | 0.733       | 0.736       |
| rCBV      | 0.682 | 0.681       | 0.684       |
| CBV       | 0.683 | 0.681       | 0.685       |
| rMTT      | 0.639 | 0.636       | 0.643       |
| MTT       | 0.653 | 0.652       | 0.655       |

## Supplementary Figures

Figures I

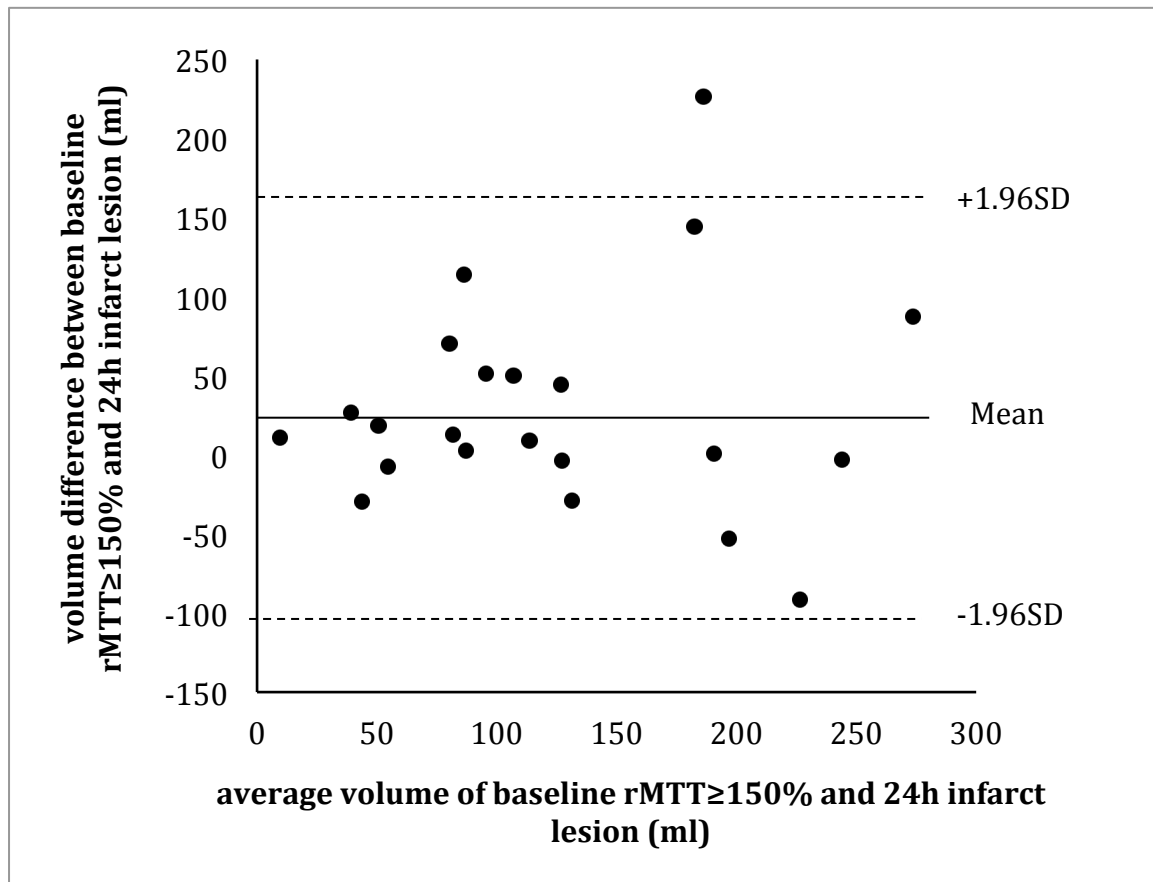

Figure I. Volumetric agreement of baseline rMTT $\geq$ 150% (minimal-reperfusion group). the



Figure II

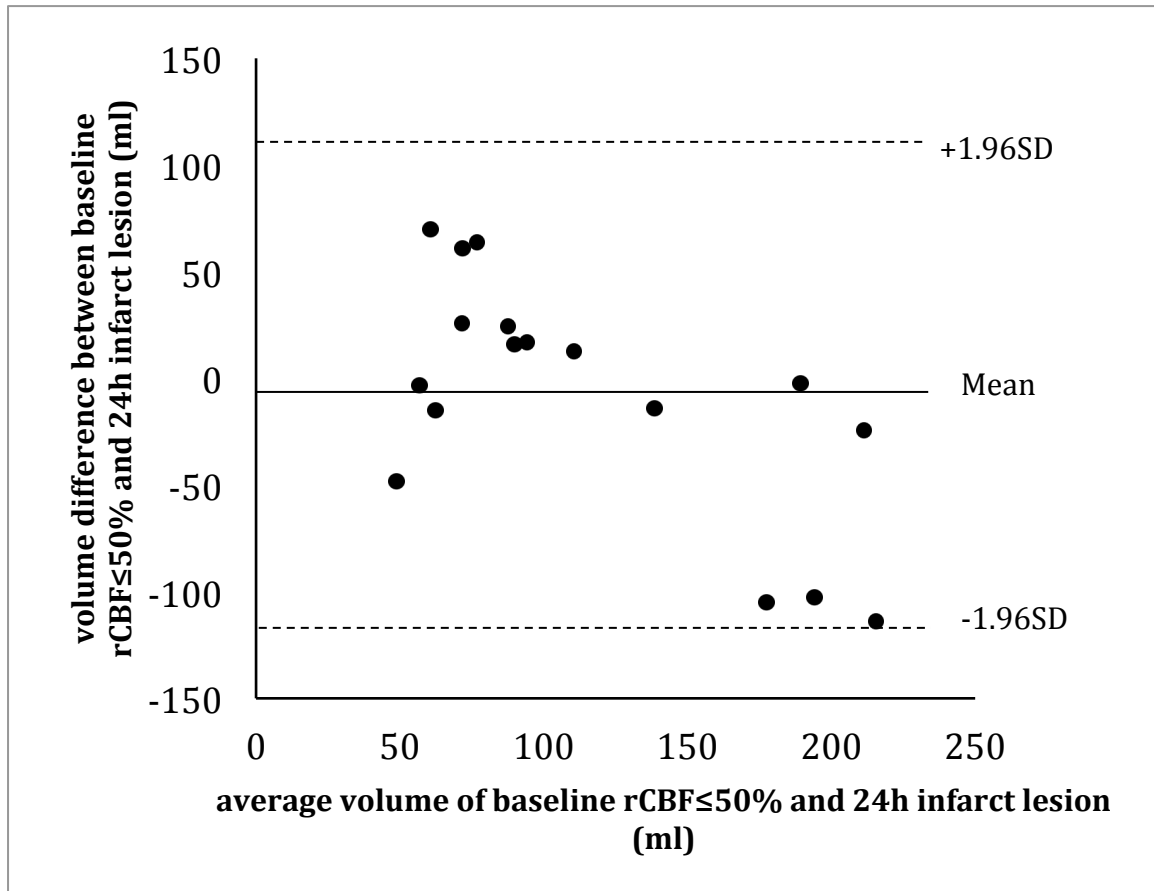

Figure II. Volumetric agreement of baseline rCBF≤50% (minimal-reperfusion group).

Figure III

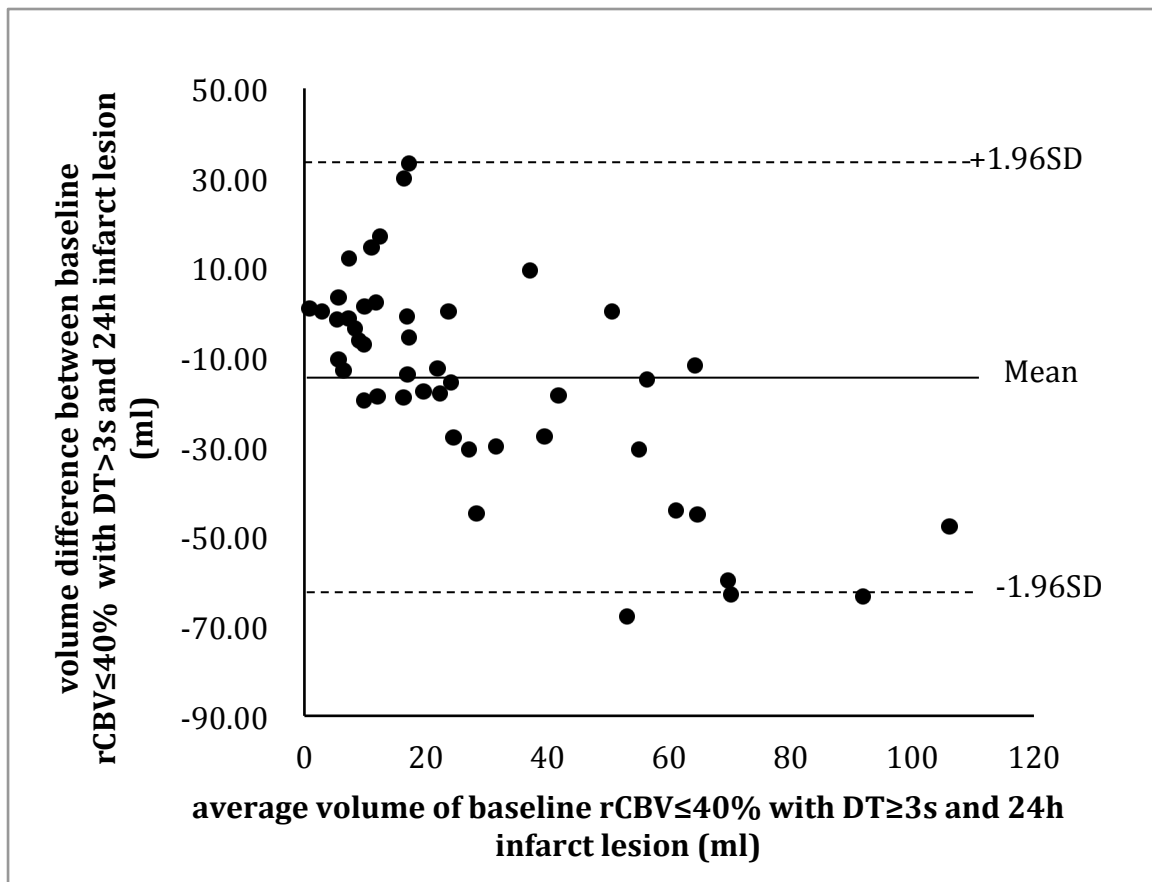

Figure III. Volumetric agreement of baseline rCBV≤40% within DT≥3s and 24h infarct lesion (major reperfusion group). The plot indicates the correlation between volume difference and average volume ( $r^2=0.38$ ).

Figure IV

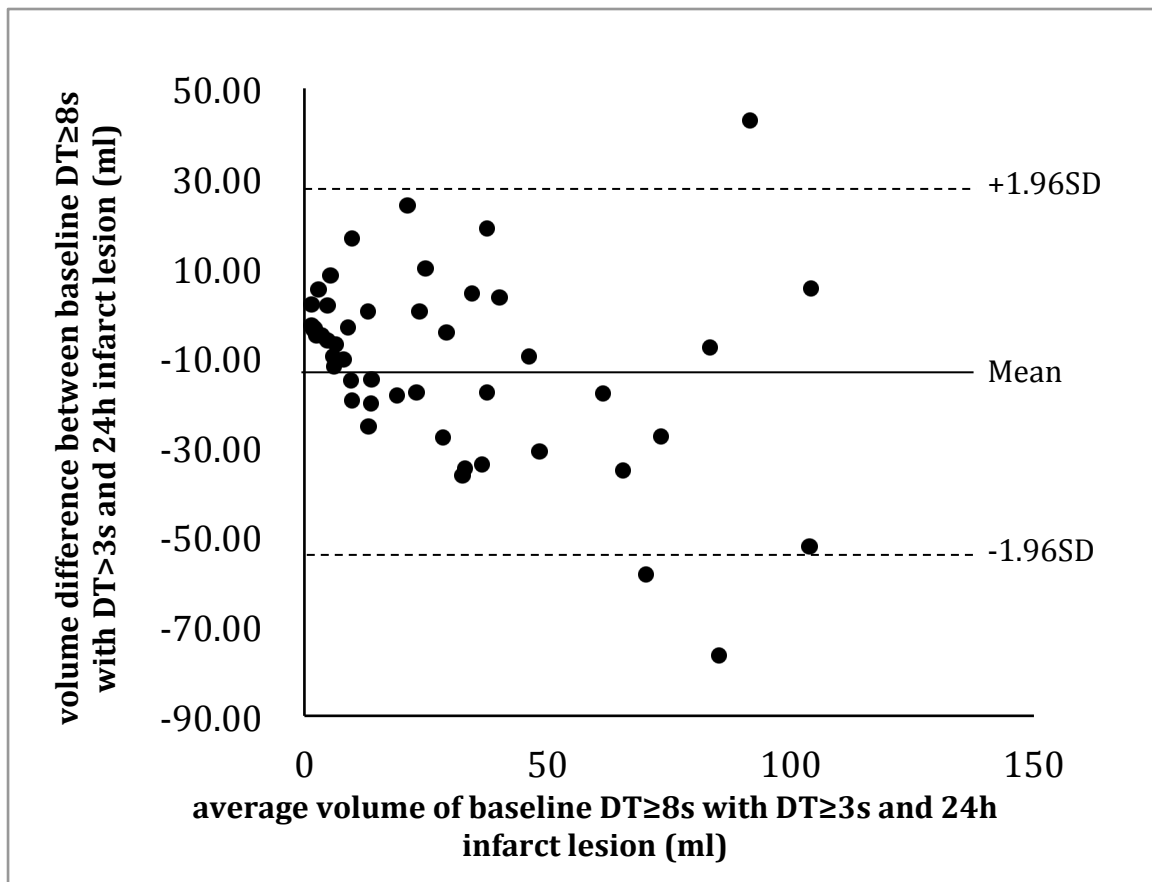

Figure IV. Volumetric agreement of baseline DT ≥ 8s within DT ≥ 3s and 24h infarct lesion (major reperfusion group).
